# Supplementary material for: Effects of low and high maternal protein intake on fetal skeletal muscle miRNAome in sheep
Source: Preprints.org preprint supplement (doi:10.20944/preprints202403.1208.v1), 2024-03-20
Supplement: Supplementary file 1 [file supplementary]

## Sheet: Sayfa1
oar-miR-3957-5p	oar-miR-432	oar-miR-409-3p	oar-miR-493-3p	oar-miR-379-5p	oar-miR-134-5p	oar-miR-127	oar-miR-200c	oar-miR-181a	let-7c	miR-362-3		Overall
MT-ATP6	FAM126A	CAMTA1	DPY30	EIF4G2	ARHGAP20	P2RX6	ZEB1	ZNF781	HMGA2	CCSER1		MT-ATP6
ALDH18A1	CYP3A5	CCT5	ITPRIPL1	CLCN6	KIAA1045	C17orf96	LHFP	ZNF283	FIGN	CENPK		ALDH18A1
NR1I3	LCMT1	GNG12	ANKRD29	UBE2E3	HYAL1	MAPK4	SEC23A	ZNF788	ARID3B	ARL4A		NR1I3
TXNL4A	SPATA31A6	UBXN4	MAP1LC3B	CDKN2AIP	DKFZP434H0512	SETD8	INTS8	ZNF791	LIN28B	SERTAD4		TXNL4A
MACROD1	SPATA31A1	CAMK2N2	SRSF11	CSNK2B-LY6G5B-1181	HABP4	DNAH10OS	RECK	ZNF136	NR6A1	NHLH1		MACROD1
PRAF2	SPATA31A3	VLDLR	PEA15	DNAJB5	TCF21	FTSJ2	CFL2	ZNF594	TRIM71	DAZ4		PRAF2
ARL14EPL	SPATA31A5	CPSF6	SOSTDC1	RAB30	GATC	MTSS1L	GPM6A	ZNF302	POLR2J2	FBXO3		ARL14EPL
LETMD1	SPATA31A4	ZBTB34	YTHDF2	ZBTB26	TP53I11	MEGF8	RAP1B	ZFP30	LIN28A	DAZ3		LETMD1
AF196779.12	SPATA31A7	LRP8	TANGO2	GATC	C6orf120	KLHL14	FEZ2	RBAK	USP44	DAZ2		AF196779.12
WDR45	SPATA31A2	RASL12	NETO2	PXT1	LYRM2	DGKE	ST3GAL6	CTD-2228K2.5	FZD3	DAW1		WDR45
AP003774.4	SNRPD2	PDIK1L	DSN1	HLCS	GRPEL2	SEPT7	ZFPM2	ZNF268	IGDCC3	RMI1		AP003774.4
GSG1	SLC35B1		ERI2	AL021546.6	FOXP2	NUDT18	ZEB2	ZFP82	AC140061.12	CCDC91		FAM126A
ARHGDIB	GALK2		APEX1	DNAJC30	AL021546.6	RANBP3	SCAMP1	ZNF300	IGF2BP1			CYP3A5
TBL1X	GIP		PHB	RPA3-AS1	PPP1R7	PSMB5	IMMP2L	CTD-2140B24.4	YOD1			CAMTA1
HOXA9	C21orf128		PRND		LTB		USP27X	CDON	VSTM5			DPY30
RASGRF1	DEFB110		AC137932.1		FAM168B		YWHAG	UBN2	ZBTB8B			ITPRIPL1
SOCS2	CARD18		SMIM7		SSBP2		SESN1	ZNF470	METTL21B			ANKRD29
SHISA2	BPI				RBM7		PRKACB	ZNF256	BZW1			EIF4G2
OLIG3	TFRC				DTD2		CNEP1R1	ZNF23	PPP1R15B			CLCN6
C15orf26	C9orf38				TAB1		CRKL	GSKIP	ST8SIA1			ARHGAP20
MUC13	RCAN2				GPC6		TRERF1	PMAIP1	FAM222B			ZEB1
SLC35C2	RC3H1				ZNF713		ZBTB8A	CREBRF	CDK8			LHFP
HMGN2	C19orf77				AC138655.1		B3GNT1	KLF6	NGF			SEC23A
POLR2J2	CCL5				ANGPTL4		TMEFF2	C2CD5	CCL7			ZNF781
HDC	CHCHD4						PMAIP1	ZNF625	HAND1			ZNF283
CNTNAP1	RGMA						SGCE	OSBPL3	DTX2			ZNF788
OTX1	CDPF1						TWISTNB	ZNF33B	BACH1			ZNF791
WDFY4	KRT10						ERRFI1	HMBS	ARID3A			ZNF136
PIGZ	CASP14						RAP2C	S1PR1	PXT1			ZNF594
OSM	TCP11L2						NOG	FLJ00104	ZNF275			ZNF302
FAM169A	ASB12						SMIM15	CPNE2	ZNF512B			ZFP30
MOB3B	CCL26						C16orf52	C11orf73	TGFBR1			RBAK
C5	HSPB6						TCEB1	ZNF780A	GATM			CTD-2228K2.5
GMCL1	RPE						CNN3	PCDHA1	PBX3			ZNF268
SOX12	C1QTNF9B						PTHLH	APOO	LRIG3			ZFP82
ERN1	M1AP						USP25	TNFRSF11B	RNFT1			ZNF300
KCTD2	C14orf132						GAS2L3	FBXO34	ANKRD30A			CTD-2140B24.4
IER5L	ABHD6						CCNJ	POC1B-GALNT4	ZBTB16			CDON
CCDC3	RASGRF1						PAPD5	RAB30	HOXB1			UBN2
CDKN2B	ZNF527						TMEM17	ASAH2B	TMEM234			ZNF470
PPFIBP2	MROH8						HIPK3	GABRA1	FAM103A1			HMGA2
TBC1D22B	ATP6V0D1						VTI1B	SPP1	FOXP2			FIGN
LGI2	AC024940.1						CRTAP	ZFAND6	AP1S1			ARID3B
GLS2	PCBP3						MMD	CLVS1	ONECUT3			LIN28B
LYPD1	NLGN4X						JHDM1D	ERH	ADRB2			NR6A1
TOM1	LGALS3BP						QKI	ZFP69B	COIL			TRIM71
CARD11	EPS8L3						ETS1	CTDSPL	AMT			POLR2J2
TRIM25	GBAS						LPPR1	E2F5	KCTD17			LIN28A
ATP6V1A	ANKRD30A						GDI2	ZNF286B	GNG5			USP44
CDK6	RRNAD1						GNAQ	BHLHE40	PPP1R27			FZD3
ATP6V1E1	DST						SNAP25	PAPD5	CCNJ			IGDCC3
ZBTB7A	LL22NC03-63E9.3						LARP1B	NPEPPS	PAPPA			AC140061.12
PIGU	HEATR4						KANK2	RBBP7	GEMIN7			IGF2BP1
ATP5G3	ADAM33						ZNF532	ITSN1	MDM4			YOD1
FOXO6	IL7						PTPN13	HOXD1	IGF2BP2			VSTM5
TUBA1A	C7orf34						PPP4R2	DCUN1D1	TTC31			ZBTB8B
LAYN	PPIF						PUM2	DCAF12L1	LRIG2			METTL21B
AC007421.1	LRRC57						RNFT1	EPT1	RAB11FIP4			BZW1
CTD-2207O23.12	CHST9						PAIP2	MFAP3L	DDX19B			PPP1R15B
C7orf43	KCNJ13						JKAMP	SMCO1	HOXA1			ST8SIA1
RP11-147C23.1	STYK1						GMFB	GPD1L	MED8			FAM222B
MT-ND4L	RPS16						RANBP10	CBX7	DDX19A			CDK8
CNTD2	SLC7A8						KLF10	MTX3	MYCN			NGF
ZNF280B	GSC2						NR5A2	EXOSC3	NEK3			CCL7
ARMC7	NOP2						CLIC4	ZFAND5	ARHGEF38			HAND1
CAMK1G	E2F3						CCT6A	HOXA1	CPEB2
MACROD2	MDM2						CACUL1	EPC2	TNFSF9
C6orf106	DEPDC1B						GPR27	VHL	XRN1
CDK14	KRTAP21-2						MARCKS	RAB8B	CD200R1
DERL3	KLHL12						GIT2	PI4K2B	QARS
HIST2H3C	LAMA2						GTF2E1	OTOGL	CCND2
FCER1A	RPP25						RAB21	BEND3	NRAS
ISL2	RSPH3						LIN7B	IK	CRCT1
LTBP2	RP11-176H8.1						BNC2	LMO3	IGSF1
PKIA	HDGFRP3						FLII	PRKCD	AIFM1
TTC13	RASSF2						IL7	KLF15	DNASE1L2
TSGA10	ZNF557						ZFAND6	AC068987.1	ITGB3
FOSB	HIVEP3						BAG6		CACNG4
GNAT2	RNF148						BDP1		ZNF710
FEV	C1orf174						CDKN1B		MARS2
CIITA	SSU72								LPGAT1
SCARF1	CDC42SE2								SALL4
CHRNB2	NKRF								PTAFR
PRRG1	AC005003.1								SNX30
WNT9B	TMEM260								SLC19A3
LMOD2	CCL3								GXYLT1
IRX6	CD74								ADAMTS8
LY6G5B	CXorf21								TARBP2
TOMM40	KAT8								EDN1
UBP1	FAM27E3								APBB3
RPL36A-HNRNPH2	FAM27E1								IL13
PLXNA2	GABRA5								C8orf58
HMGCS1	ANKRD66								CASP3
MIF4GD	FHAD1								GNPTAB
UBXN10	AC022498.1								KCTD21
HIST2H3A	TIMP2								SMIM3
COX6B2	RAB3B								ZNF341
	SDR9C7								EOGT
	C1QTNF9								DDI2
	KCNMA1								RNF165
	COL4A5								DUSP22
	S1PR3								CPA4
	C2orf48								GPATCH3
	ACAD9								MAPK6
	CCL3L3								POU2F1
	FPGS								MAP4K3
	NTRK2								NDST2
	CCL3L1								STX3
	FAM27E2								PIGU
	ETV3L								TTLL4
	RNF141								GPX7
	C14orf182								PRPF38B
	RAB38								PEX11B
	LINC00998								RRM2
	GPX2								CCNF
	CDKN1B								UHRF2
	PTRF								S100A8
	PPP3CC								LOR
	FAM107A								BDP1
	C3orf18								TET3
	DND1								PLEKHG7
	CAMK1G								CNTRL
	CLDN11								WNT9A
	GALNTL6								ACVR1C
	ZFP2								CPEB4
	PPAPDC1A								HTR1E
	TSPAN10								USP38
									PARD6B
									SOWAHA
									SOCS1
									CPEB1
									KPNA5
									B3GNT1
									LCOR
									HMGA1
									SKIL
									PRR18
									SMUG1
									C20orf194
									MXD1
									FRMD4B
									FASLG
									E2F6
									ZNF784
									DNAJC30
									ABCB9
									ONECUT2
									GIPC1
									ARG2
									PPAPDC2
									XKR4
									PGRMC1
									TP53
									CCR7
									SKIDA1
									E2F5
									PSORS1C2
									ITGB7
									RNF7
									IGF1R
									DNAJC1
									ZNF354A
									ZNF689
									SASS6
									RDH10
									PARM1
									AC068987.1
									SMARCAD1
									KLHDC8B
									TRIM41
									GPR156
									CHRNA7
									PALD1
									GCNT4
									PKIA
									SLC25A27
									COL27A1
									AC010441.1
									WDFY4
									THRA
									AKAP5
									GAS7
									FAM178A
									CDKN1A
									TMEM194A
									ADAMTS15
									CPEB3
									PTAR1
									TPP1
									ADRB3
									ZNF641
									XKR8
									ZC3HAV1L
									PLA2G15
									FAM214B
									NME4
									PPARGC1B
									CEP135
									MFSD4
									CASP5
									RGS16
									TAF9B
									DIAPH2
									COL1A2
									ZNF583
									OSMR
									EIF4EBP2
									CDC25A
									KLHL23
									GRID2IP
									CSRNP3
									ERO1L
									FAM160B2
									PLA2G3
									HOXA9
									CLP1
									RSPO2
									NYNRIN
									SLC30A4
									CCSAP
									CANT1
									MEIS1
									CBX2
									TMEM41A
									ARL4D
									TBKBP1
									PRDM5
									DUSP16
									EFHD2
									RGAG1
									CCL3L1
									PIGA
									RBMS1
									RDX
									KIAA1958
									EIF4G2
									CCL3L3
									ZBTB26
									SLC20A1
									RNF39
									NAA30
									CCL3
									ZNF200
									NEU3
									STK40
									LIMD2
									NSMCE2
									GALC
									ZFYVE26
									TMC7
									ZNF879
									ZC3H3
									TLR5
									IGF2BP3
									XK
									SLC6A5
									ANKRD46
									EEF2K
									PLEKHA8
									SNAP23
									HOXD1
									STX17
									B3GNT7
									PRRX1
									PRKAR2A
									ATPAF1
									CYP46A1
									AHCTF1
									BTF3L4
									SLC5A6
									DDX26B
									IL10
